# Supplementary material for: Identification and rescue of a tRNA wobble inosine deficiency causing intellectual disability disorder
Source: PubMed Central journal article supplement — RNA. 2020 Nov;26(11):1654–66. doi: 10.1261/rna.076380.120 (PMC7566568; doi:10.1261/rna.076380.120), 2020-11
Supplement: supp_076380.120_Supplemental_Table1.pdf [file supp_076380.120_Supplemental_Table1.pdf]

| Case                                 | This study                                                            |                                                                                   |                                                                                           | Alazami et al, El-Hattab AY. et al | Sharkia et al                                                                                        | Salehi Chaleshtori et al          | Thomas et al                                                                           | Total        |
|--------------------------------------|-----------------------------------------------------------------------|-----------------------------------------------------------------------------------|-------------------------------------------------------------------------------------------|------------------------------------|------------------------------------------------------------------------------------------------------|-----------------------------------|----------------------------------------------------------------------------------------|--------------|
|                                      | II:1                                                                  | II:2                                                                              | II:3                                                                                      |                                    |                                                                                                      |                                   |                                                                                        |              |
| Detcted variants ADAT3 [NM_138422.3] | c.587C>T; p.(Ala196Val)<br>c.820C>T; p.(Gln274*)                      |                                                                                   |                                                                                           | c.430G>A;<br>p.Val144Met Ψ, §      | c.430G>A;<br>p.Val144Met Ψ                                                                           | c.99_106dup;<br>p.Glu36Glyfs*44 Ψ | c.587C>T; p.(Ala196Val)<br>c.586_587delinsTT;<br>p.Ala196Leu                           |              |
| Age (years) / Gender                 | 13 y / M                                                              | 9 y / F                                                                           | 4 y / F                                                                                   |                                    | M/F                                                                                                  | F                                 | F/M                                                                                    |              |
| <b>Neurology</b>                     |                                                                       |                                                                                   |                                                                                           |                                    |                                                                                                      |                                   |                                                                                        |              |
| Intellectual disability              | Severe                                                                | Severe                                                                            | Severe                                                                                    | 39/39                              | 2/2                                                                                                  | Mild                              | 2/2                                                                                    | 47/47 (100%) |
| Motor delay                          | +                                                                     | +                                                                                 | +                                                                                         | 13/15                              | 1/1                                                                                                  | nd                                | 2/2                                                                                    | 19/21 (90%)  |
| Absent speech/limited speech         | +                                                                     | +                                                                                 | +                                                                                         | 13/15                              | 1/1                                                                                                  | Speech delay                      | 2/2                                                                                    | 19/21 (90%)  |
| Hypotonia                            | +                                                                     | +                                                                                 | nd                                                                                        | 16/36                              | 2/2                                                                                                  | nd                                | 2/2                                                                                    | 22/43 (51%)  |
| Behavioural problems                 | Sleep disturbances                                                    | Sleep disturbances                                                                | Sleep disturbances                                                                        | Aggressive/<br>hyperactivity       | nd                                                                                                   | ADHD                              | -                                                                                      |              |
| Feeding difficulties                 | +                                                                     | -                                                                                 | +                                                                                         |                                    | +                                                                                                    | nd                                | 2/2                                                                                    |              |
| Spasticity                           | -                                                                     | Lower limbs                                                                       | Lower limbs                                                                               | 13/39                              | -                                                                                                    | nd                                | 1/2                                                                                    | 16/45 (36%)  |
| Gait ataxia                          | +                                                                     | +                                                                                 | nd                                                                                        |                                    | nd                                                                                                   |                                   |                                                                                        |              |
| Gait difficulties                    | +                                                                     | +                                                                                 | nd                                                                                        |                                    | 2/2                                                                                                  |                                   | nd                                                                                     |              |
| Seizures/Epilepsy (age of onset)     | Absense (2-3 y)                                                       | Initially primary<br>focal secondary<br>generalized (2.5y),<br>later absense (3y) | Absense (3 y)                                                                             | 6/39                               | -                                                                                                    | nd                                | -                                                                                      | 9/44 (20%)   |
| MRI findings                         | Increased signal<br>intensity around<br>hippocampus                   | White matter<br>abnormalities,<br>wide ventricles,<br>arachnoidal cyst            | -                                                                                         | 18/28                              | 2/2                                                                                                  | nd                                | -                                                                                      | 21/34 (62%)  |
| <b>Growth parameters</b>             |                                                                       |                                                                                   |                                                                                           |                                    |                                                                                                      |                                   |                                                                                        |              |
| Short stature                        | +                                                                     | +                                                                                 | +                                                                                         | 11/15                              | 2/2                                                                                                  | nd                                | 2/2                                                                                    | 18/22 (82%)  |
| Microcephaly                         | -                                                                     | -                                                                                 | +                                                                                         | 22/39                              | 2/2                                                                                                  | +                                 | 1/2                                                                                    | 27/47 (57%)  |
| <b>Facial features/dysmorphology</b> |                                                                       |                                                                                   |                                                                                           |                                    |                                                                                                      |                                   |                                                                                        |              |
| Forehead                             | --                                                                    | High, Broad                                                                       | -                                                                                         | 10/15                              | Prominent/High                                                                                       | nd                                | High                                                                                   | 15/21 (71%)  |
| Hypertelorism                        | +                                                                     | +                                                                                 | -                                                                                         | 3/15                               | 2/2                                                                                                  | nd                                | 2/2                                                                                    | 9/22 (41%)   |
| Epicanthus                           | -                                                                     | -                                                                                 | +                                                                                         | 6/15                               | 2/2                                                                                                  | nd                                | 1/2                                                                                    | 10/22 (45%)  |
| Strabismus                           | Intermittent                                                          | Intermittent                                                                      | Intermittent                                                                              | 32/39                              | 2/2                                                                                                  | -                                 | 2/2                                                                                    | 39/47 (83%)  |
| Eyes, other                          | Deeply set eyes,<br>anisocoria                                        | Deeply set eyes,<br>hyperopia                                                     | Deeply set eyes                                                                           | 7/15                               | Slanted palpebral<br>fissures                                                                        | nd                                |                                                                                        |              |
| Ears                                 | Squared superior<br>portion of helix,<br>short earlobe                | Squared superior<br>portion of helix,<br>short earlobe                            | Squared superior<br>portion of helix,<br>short earlobe                                    |                                    |                                                                                                      |                                   |                                                                                        |              |
| Nose                                 | High nasal bridge,<br>notched alae<br>nasea, low hanging<br>columella | Notched alae<br>nasea, low hanging<br>columella                                   | High nasal bridge,<br>notched alae<br>nasea, low hanging<br>columella                     | 8/15                               | Prominent nose                                                                                       | Depressed nasal<br>bridge         | Bulbous nasal tip                                                                      |              |
| Philtrum                             | Short, deep                                                           | Short, deep                                                                       | Short, deep                                                                               | nd                                 | nd                                                                                                   | nd                                | 2/2 (Long, smooth)                                                                     |              |
| Prominent upper front teeth          | +                                                                     | +                                                                                 | +                                                                                         |                                    | Teeth<br>abnormalities                                                                               |                                   |                                                                                        |              |
| <b>Other</b>                         |                                                                       |                                                                                   |                                                                                           |                                    |                                                                                                      |                                   |                                                                                        |              |
| Tapering fingers                     | +                                                                     | +                                                                                 | +                                                                                         |                                    |                                                                                                      |                                   |                                                                                        |              |
| Cardiac defects                      | TOF, VSD                                                              | -                                                                                 | VSD, PDA                                                                                  |                                    |                                                                                                      |                                   |                                                                                        |              |
| Other                                | IgA deficiency, no<br>forceps grip                                    | IgA deficiency                                                                    | Metopic<br>craniosynostosis,<br>constipation, high<br>palate, vomiting,<br>IgA deficiency |                                    | Plagiocephaly,<br>synophrysis, wide<br>mouth, full lips,<br>high arched<br>palate, elongated<br>face |                                   | Torticollis, myopia,<br>clinodactyli, flat feet,<br>gastroesophageal reflux<br>disease |              |

Ψ homozygous variant

§ c.382G>A; p.Val128Met in NM\_138422.1

Abbreviations: nd=not determined, PDA=patent ductus arteriosus, SD= standard deviation, TOP=tetralogy of fallot. VSD=ventricular septal defect, y=years

+ present, - absent
